# Supplementary material for: Ni,S co-doped Cu dendrites decorated with core–shell architecture assisted by MOF and Fe0.92Co0.08S nanoflakes on nanocellulose/graphene fibers for fabrication of flexible wire-type micro-supercapacitor
Source: Royal Society of Chemistry journal article supplement (doi:10.1039/d4nr02283a), 2024-01-01
Supplement: d4nr02283a1.pdf [file d4nr02283a1.pdf]

## Supporting Information

### **Ni, S co-doped Cu dendrites decorated with core-shell architecture assisted by MOF and Fe<sub>0.92</sub>Co<sub>0.08</sub>S nanoflakes on nanocellulose/graphene fibers for fabrication of flexible wire-type micro-supercapacitor**

Leila Naderi, Saeed Shahrokhian\*

*Department of Chemistry, Sharif University of Technology, Tehran 11155-9516, Iran*

---

\*Corresponding author, Tel.: +98-21-66005718; Fax: +98-21-66002983

E-mail address: [shahrokhian@sharif.edu](mailto:shahrokhian@sharif.edu)

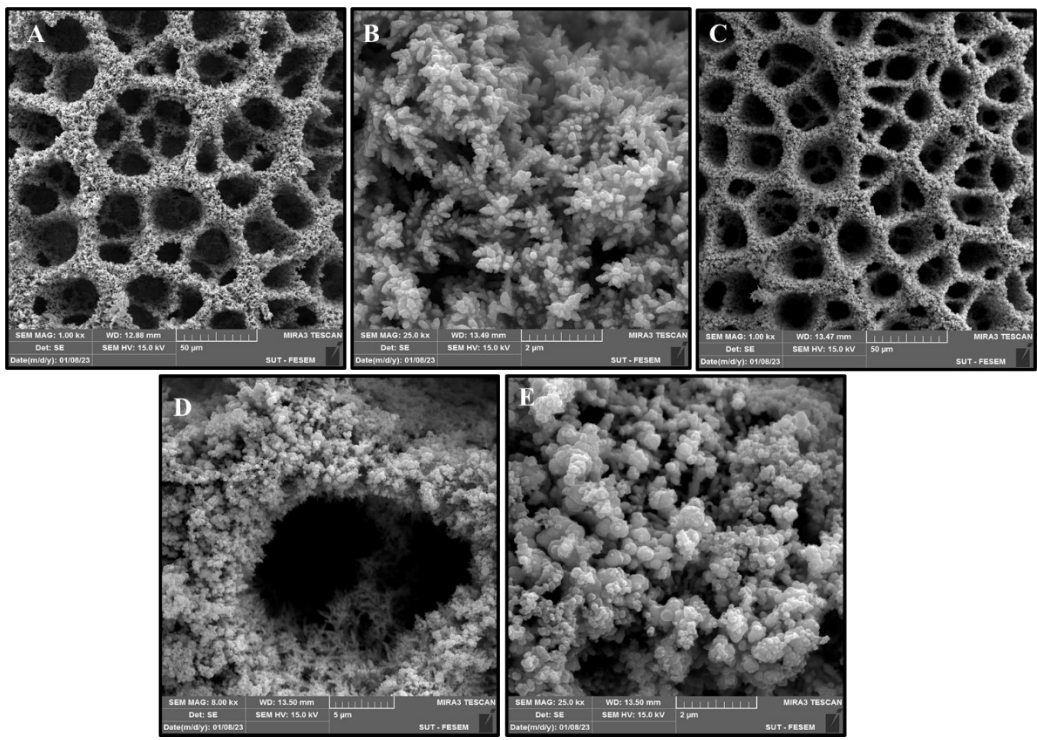

Fig. S1. FE-SEM images of the (A, B) Cu film@CW, (C-E) Ni,S-doped Cu@CW

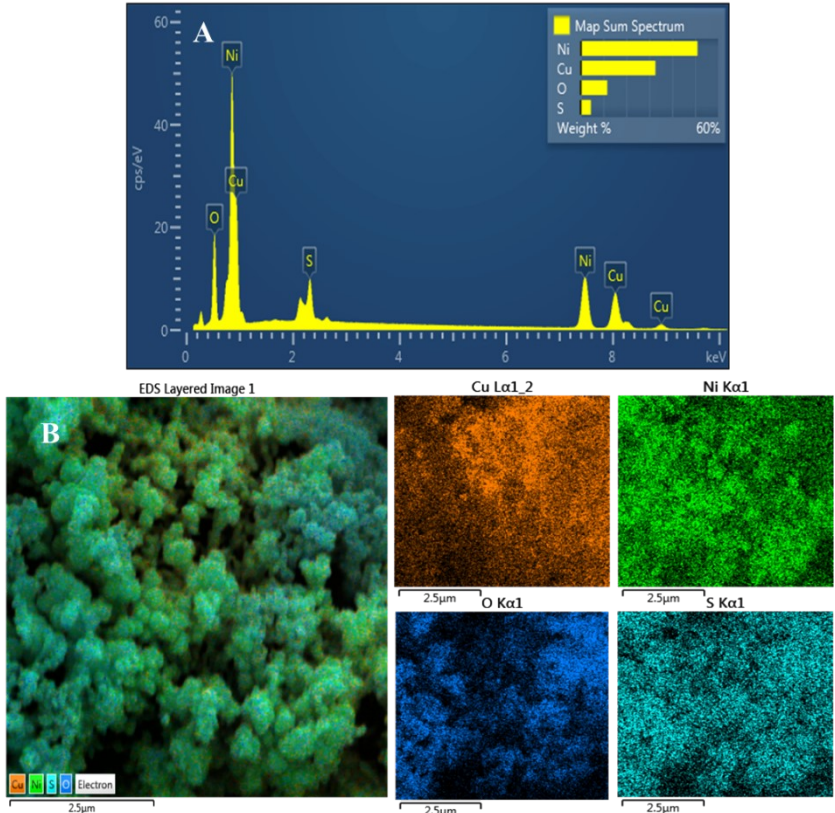

**Fig. S2.** (A) EDX spectra, (B) Elemental mapping of the Ni,S doped Cu@CW

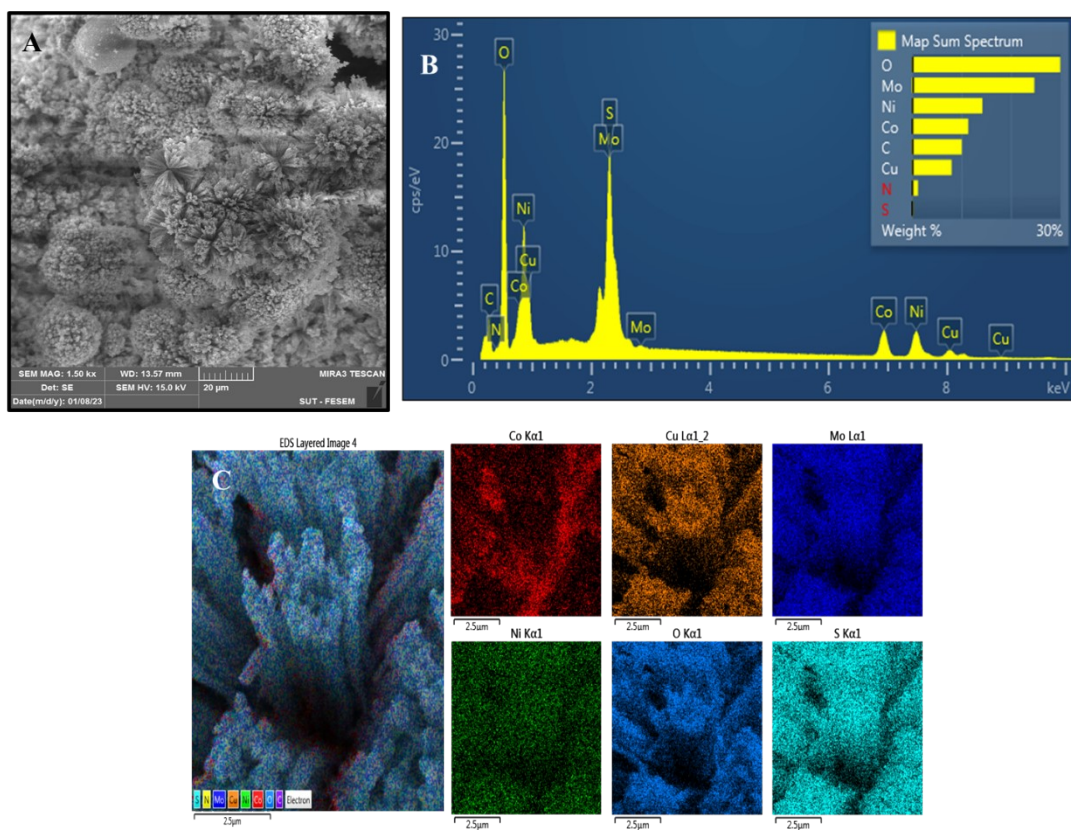

**Fig. S3.** (A) FESEM images, (B) EDX spectra, (C) elemental mapping of the NiMoCo-LTH/Ni,S-doped Cu@CW

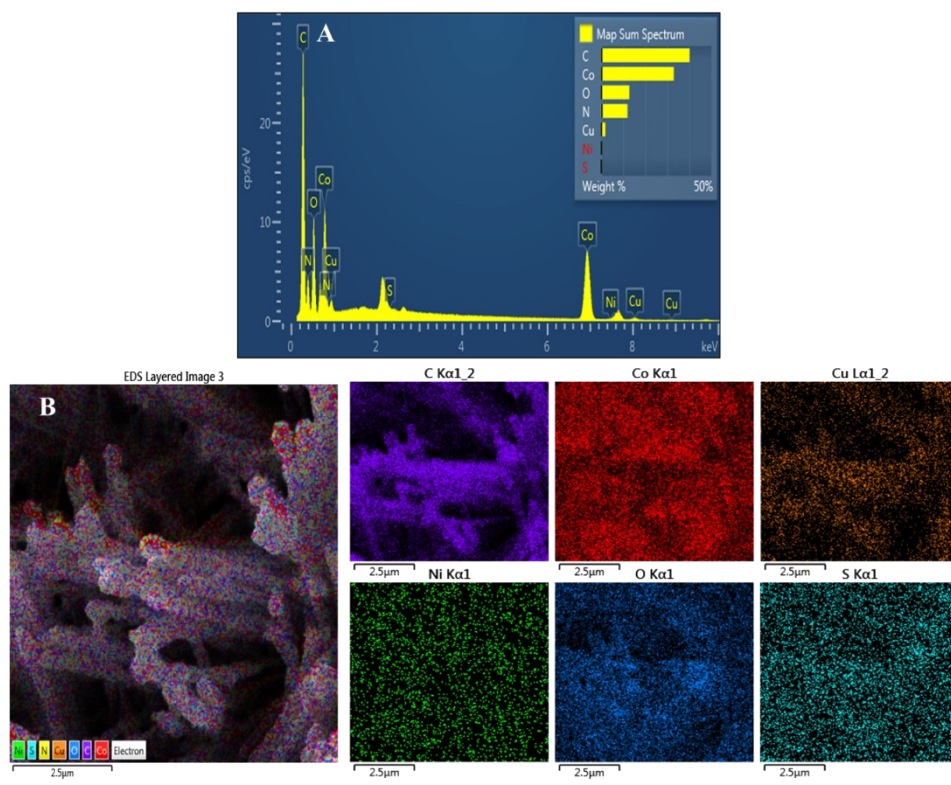

**Fig. S4.** (A) EDX spectra, (B) Elemental mapping of the ZIF-67@Ni,S-doped Cu@CW

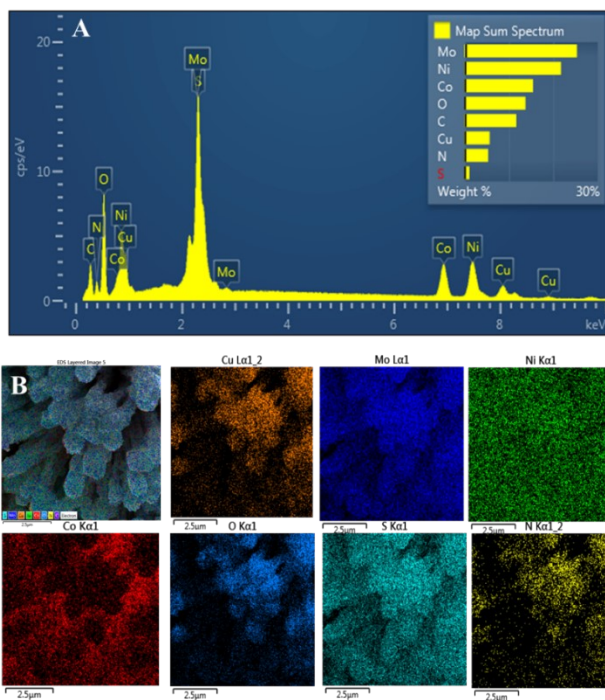

**Fig. S5.** (A) EDX spectra, (B) elemental mapping of the Ni<sub>2</sub>Mo<sub>3</sub>N-CoN/Ni,S-doped Cu@CW



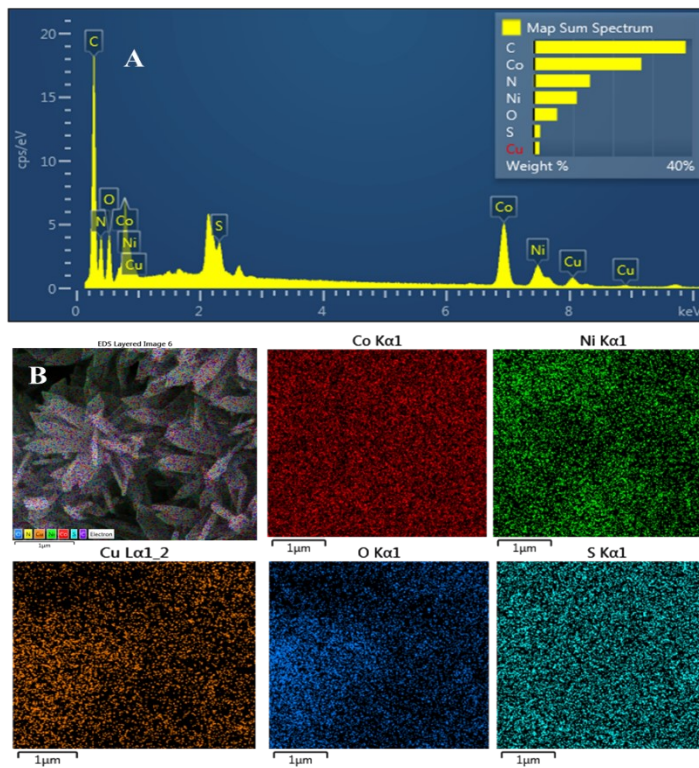

**Fig. S6.** (A) EDX spectra, (B) elemental mapping of the ZIF-Co leaf-like/Ni,S-doped Cu@CW

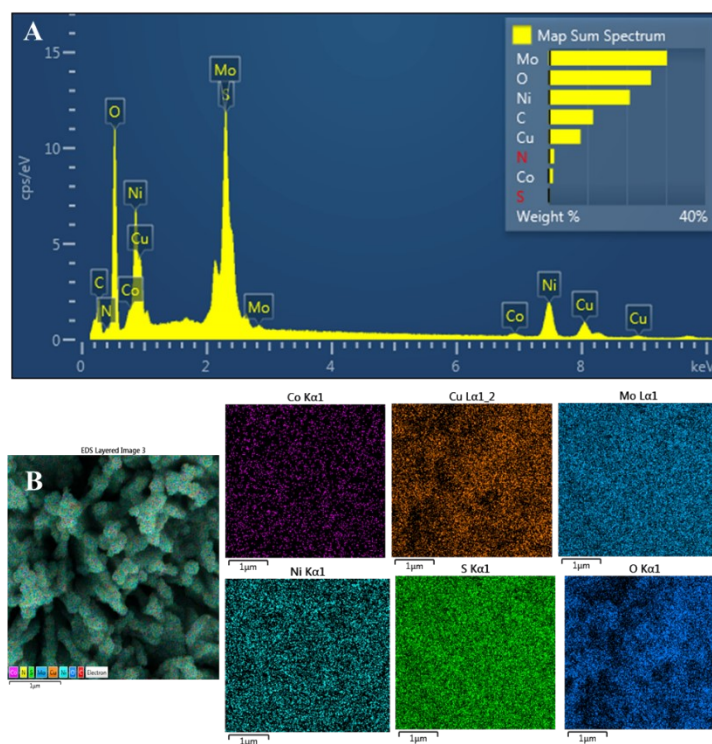

**Fig. S7.** (A) EDX spectra, (B) elemental mapping of the L-NiMoCo-LTH/Ni,S-doped Cu@CW

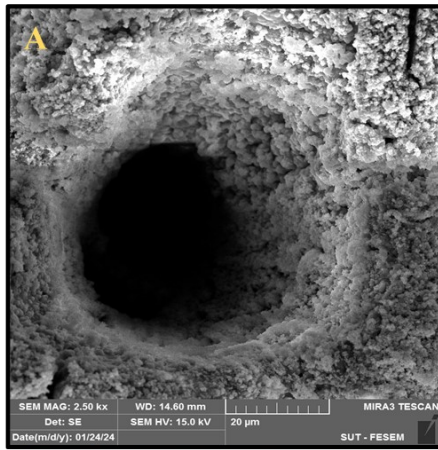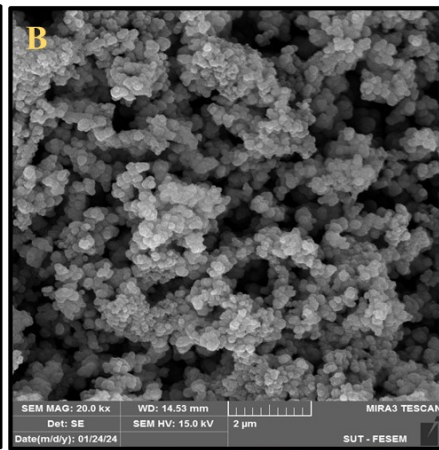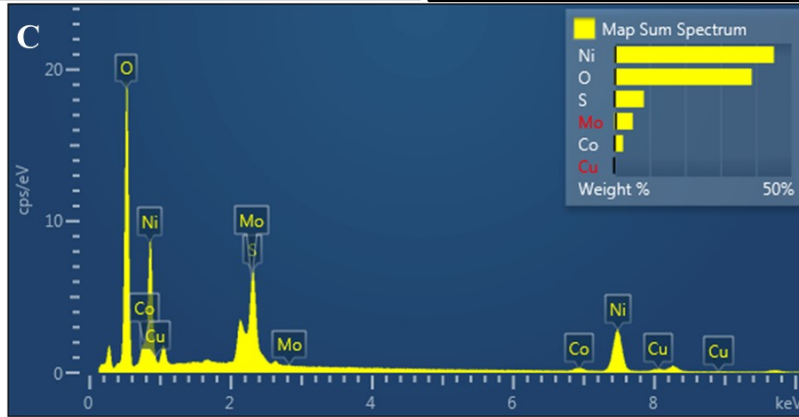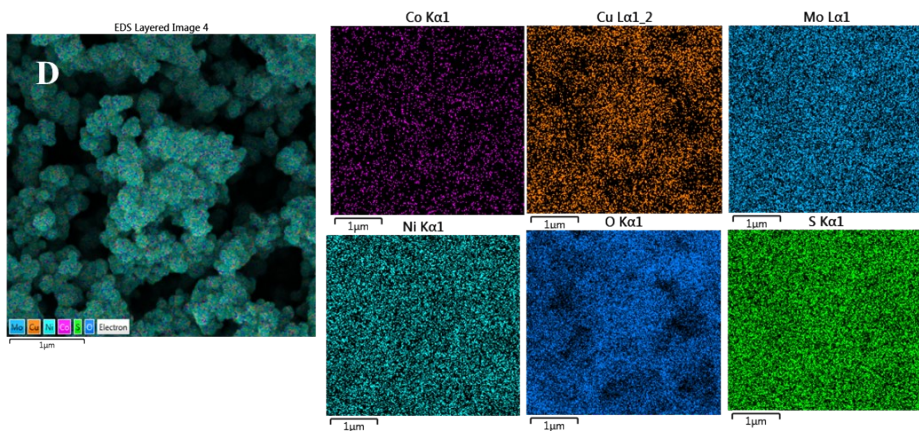



**Fig. S8.** (A, B) FE-SEM images, (C) EDX spectra, (D) elemental mapping of the E-NiMoCo-LTH/Ni,S-doped Cu@CW

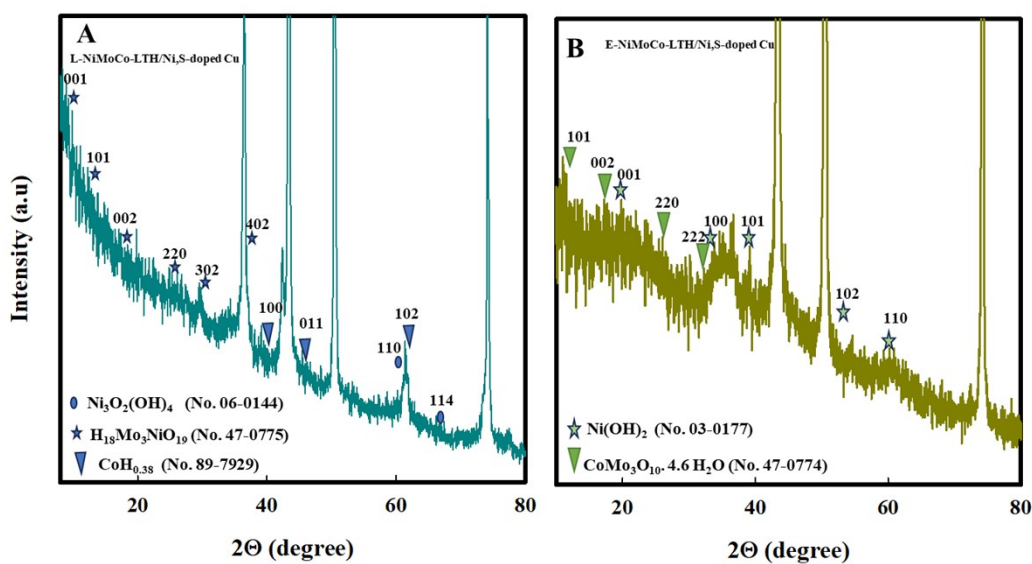

**Fig. S9.** XRD patterns of the (A) L-NiMoCo-LTH/Ni,S-doped Cu@CW, and (B) E-NiMoCo-LTH/Ni,S-doped Cu@CW



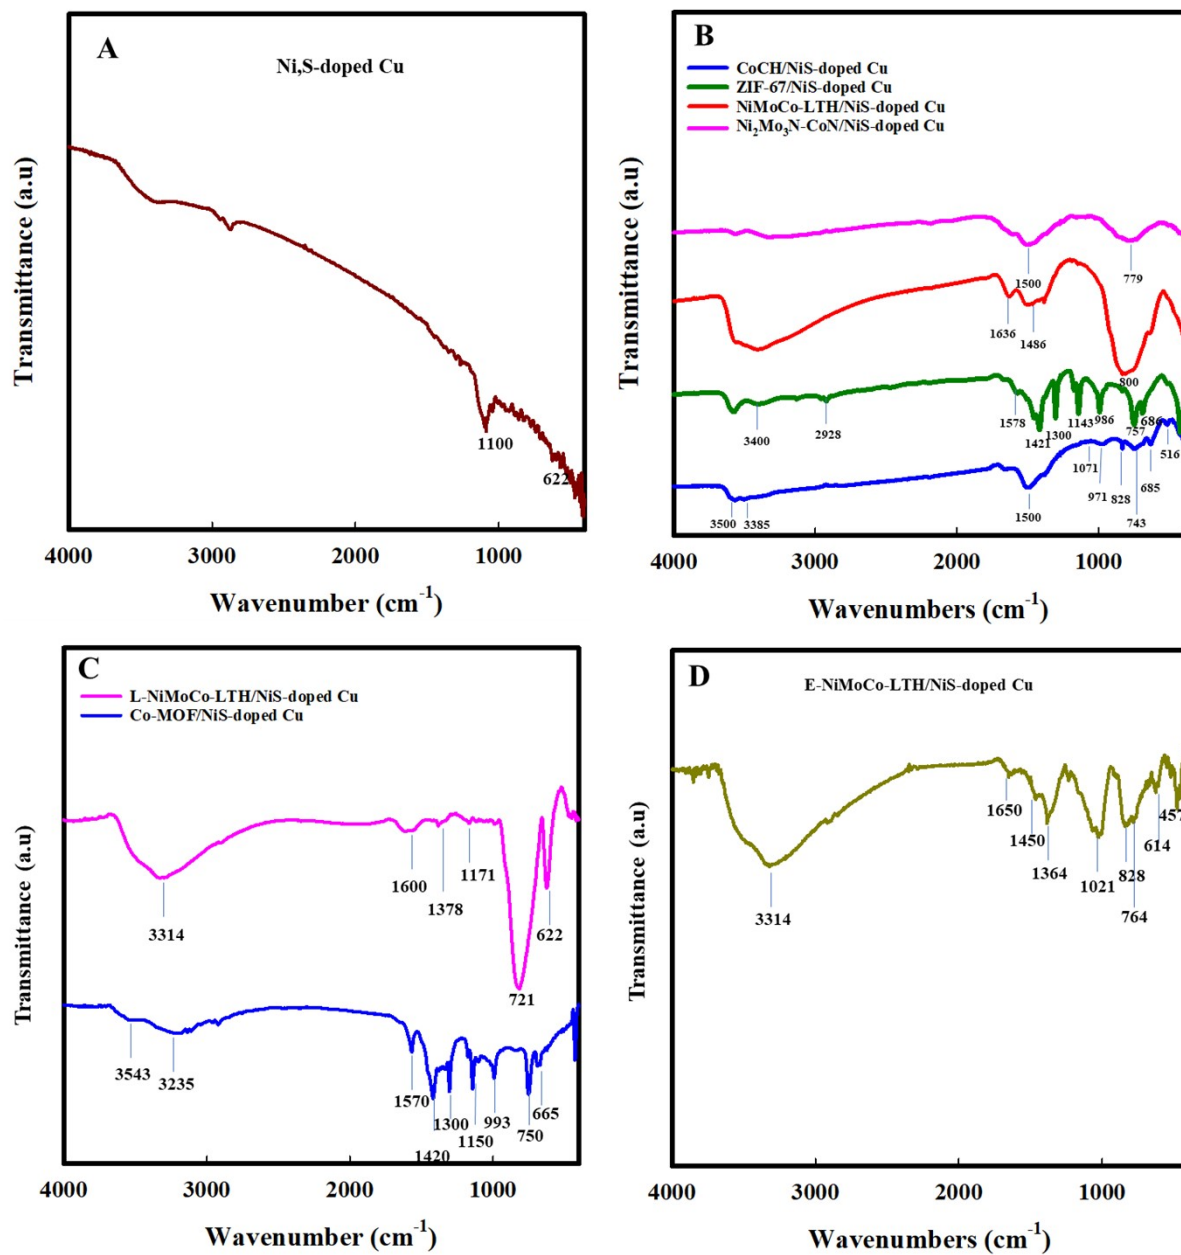

**Fig. S10.** FT-IR spectra of the (A) Ni,S-doped Cu, (B) CoCH/Ni,S-doped Cu, ZIF-67/Ni,S-doped Cu, NiMoCo-LTH/Ni,S-doped Cu, Ni<sub>2</sub>Mo<sub>3</sub>N-CoN/Ni,S-doped Cu, (C) ZIF-Co leaf-like/Ni,S-doped Cu, L-NiMoCo-LTH/Ni,S-doped Cu and (D) E-NiMoCo-LTH/Ni,S-doped Cu

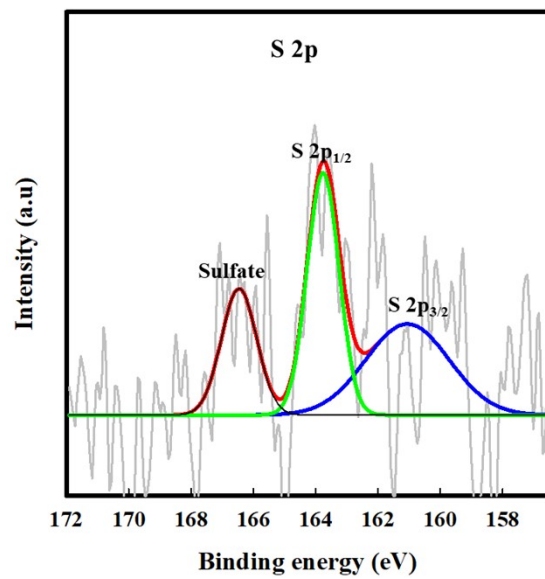

**Fig. S11.** XPS spectra of the S 2p



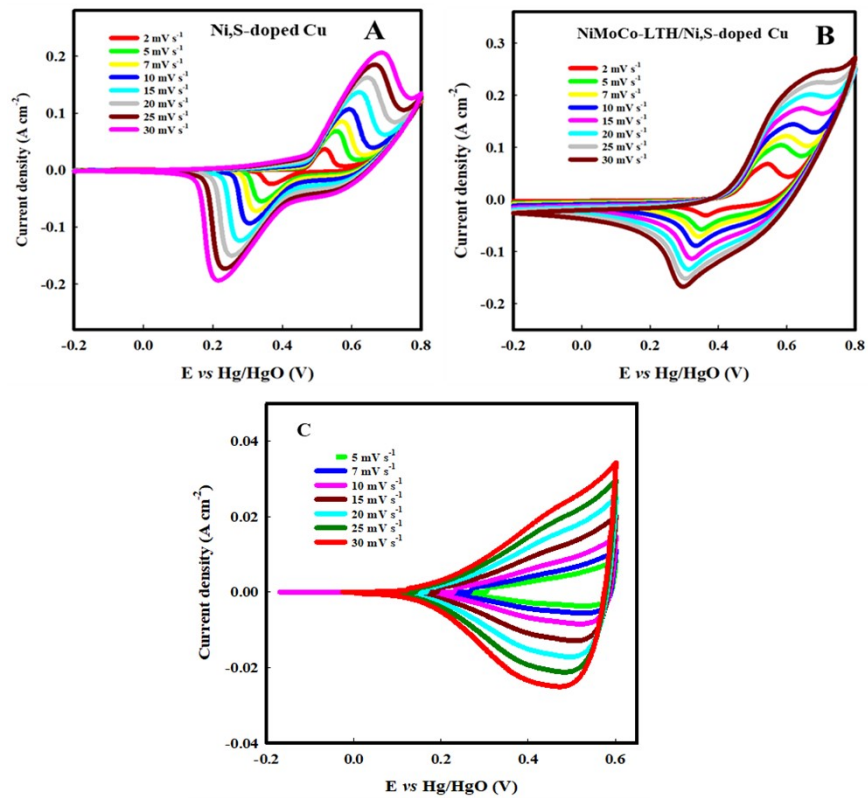

**Fig. S12.** CV curves of the (A) Ni,S-doped Cu@CW, (B) NiMoCo-LTH/Ni,S-doped Cu@CW and (C) Cu film at different scan rates

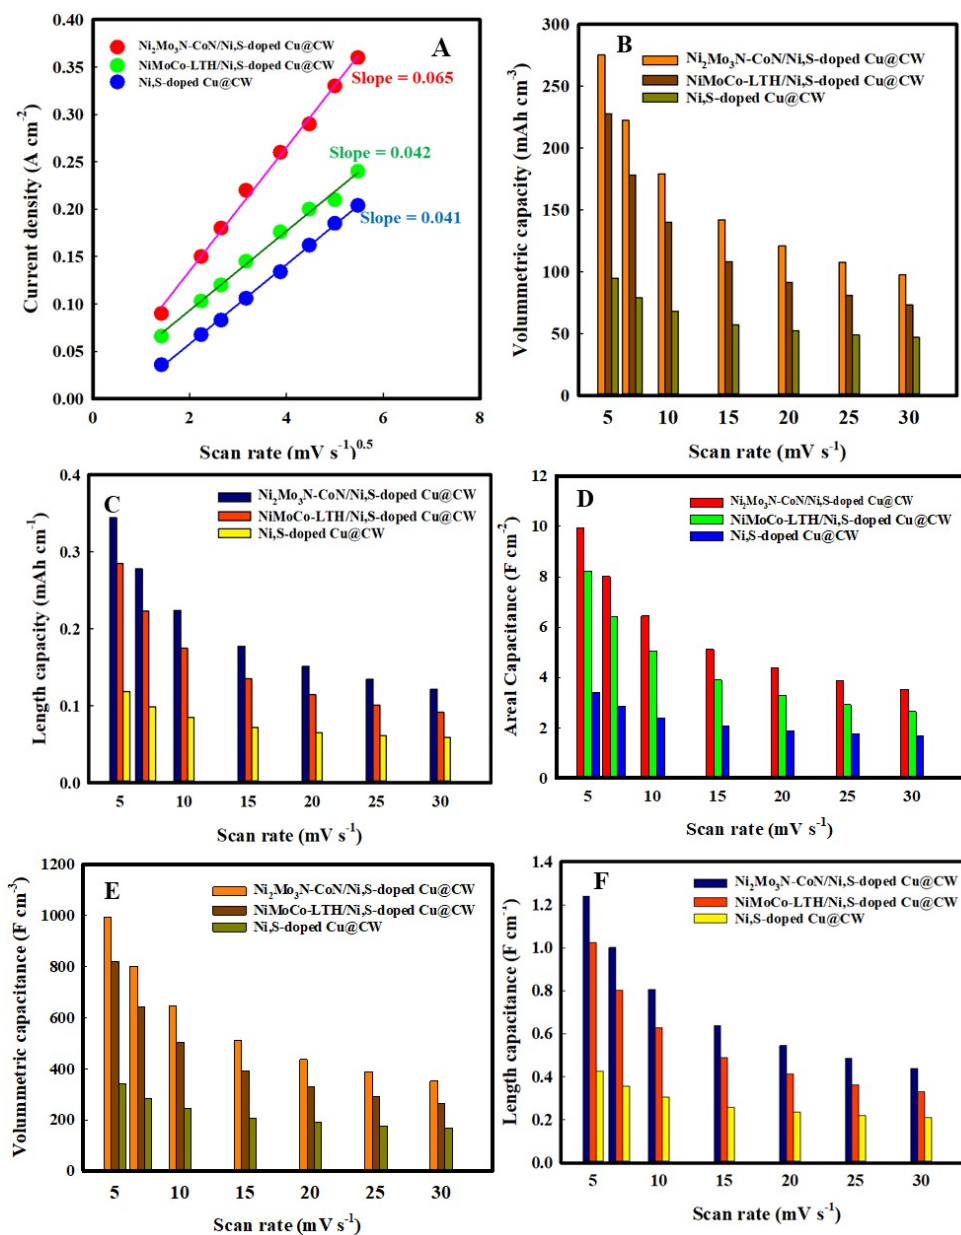

**Fig. S13.** (A) Plot of the current density as function of the scan rate square root, (B) Plot of the volumetric and (C) length capacities, (D) Areal, (E) volumetric and (F) length capacitance calculated from CV curves for the  $\text{Ni,S-doped Cu/CW}$ ,  $\text{NiMoCo-LTH/Ni,S-doped Cu@CW}$ ,  $\text{Ni}_2\text{Mo}_3\text{N-CoN/Ni,S-doped Cu@CW}$  microelectrodes at different scan rates.

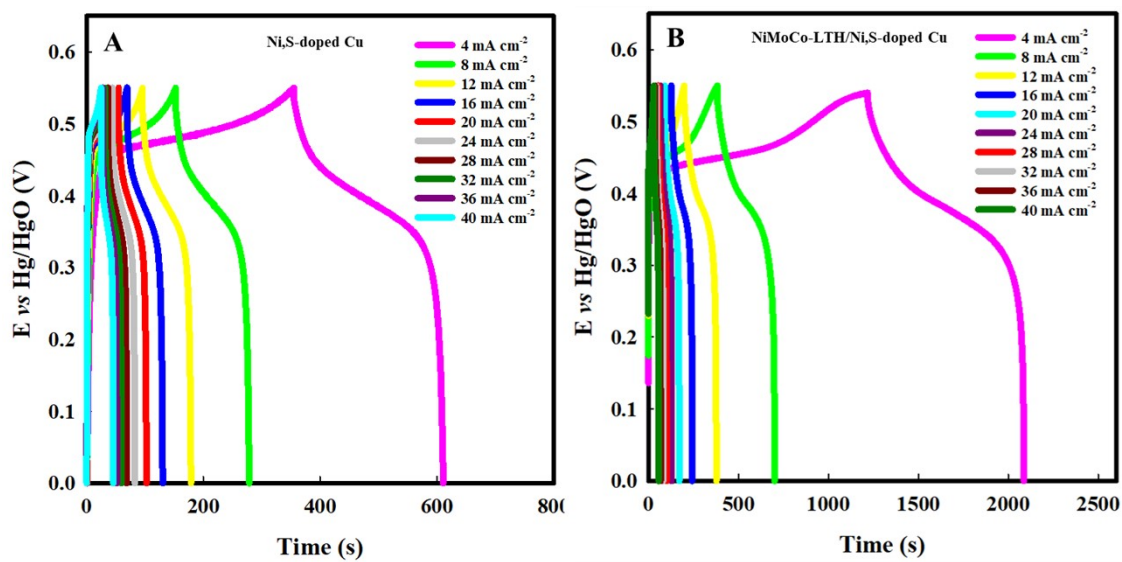

**Fig. S14.** GCD curves of the (A) Ni,S-doped Cu and (B) NiMoCo-LTH/Ni,S-doped Cu at different current densities

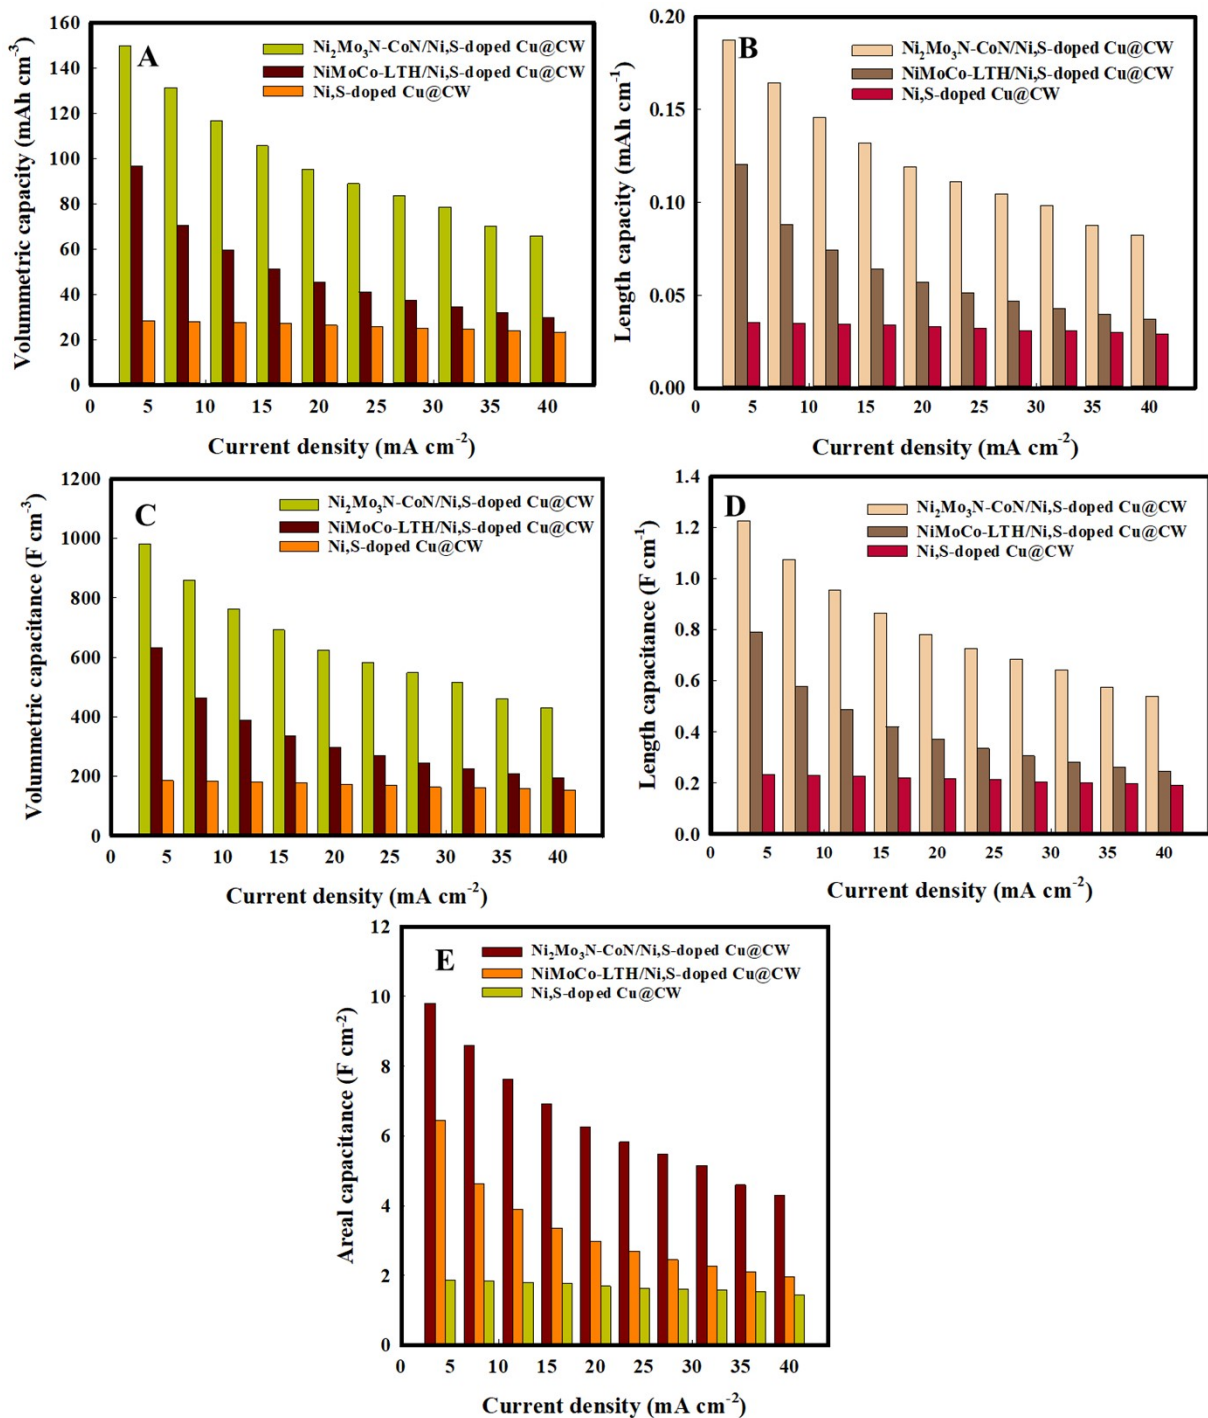

**Fig. S15.** Plot of the (A) volumetric, (B) length capacities and (C) volumetric, (D) length, (E) areal capacitances calculated from GCD curves for the Ni,S-doped Cu/CW, NiMoCo-LTH/Ni,S-doped Cu@CW, Ni<sub>2</sub>Mo<sub>3</sub>N-CoN/Ni,S-doped Cu@CW microelectrodes at different current densities.



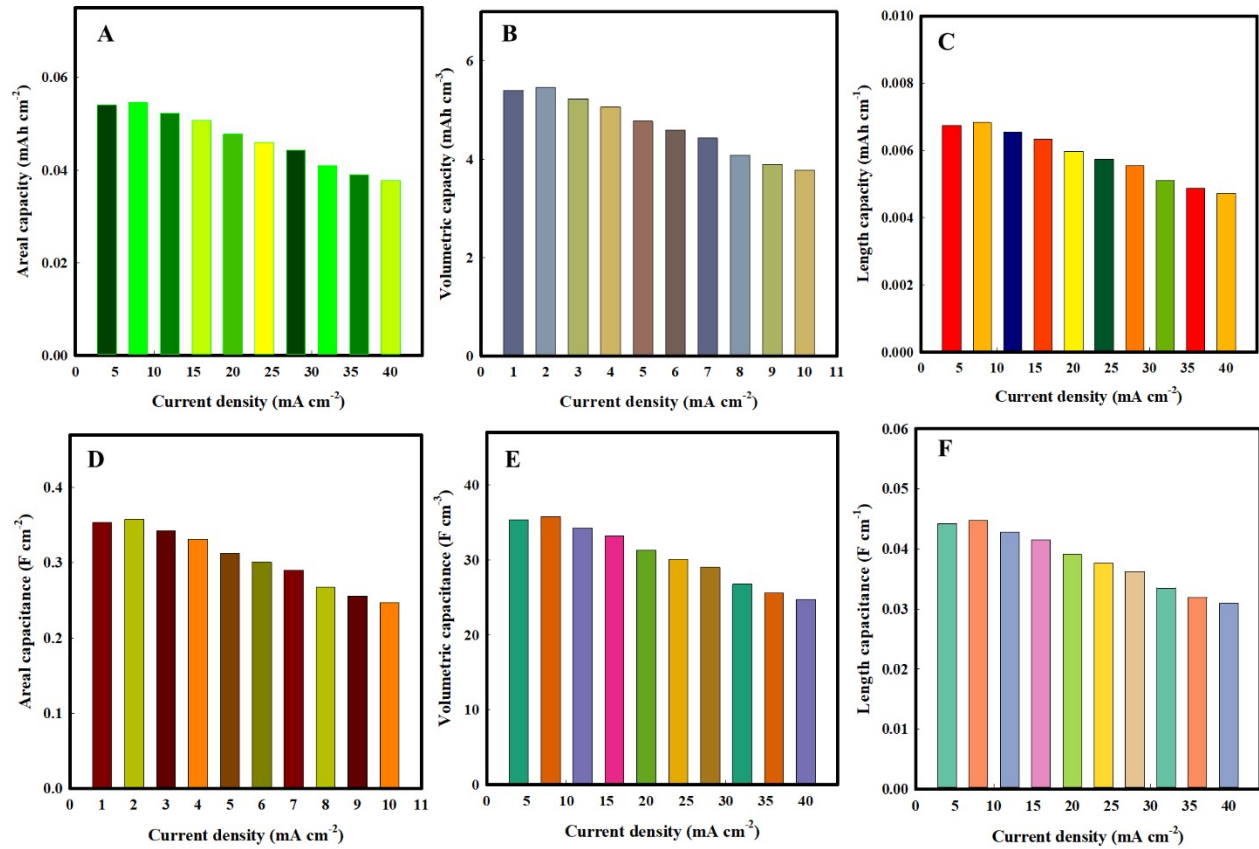

**Fig. S16.** Plot of the (A)Areal, (B) volumetric and (C) length capacities and (D) Areal, (E) volumetric and (F) length capacitances, calculated from GCD curves for the Cu film@CW microelectrode at different current densities.

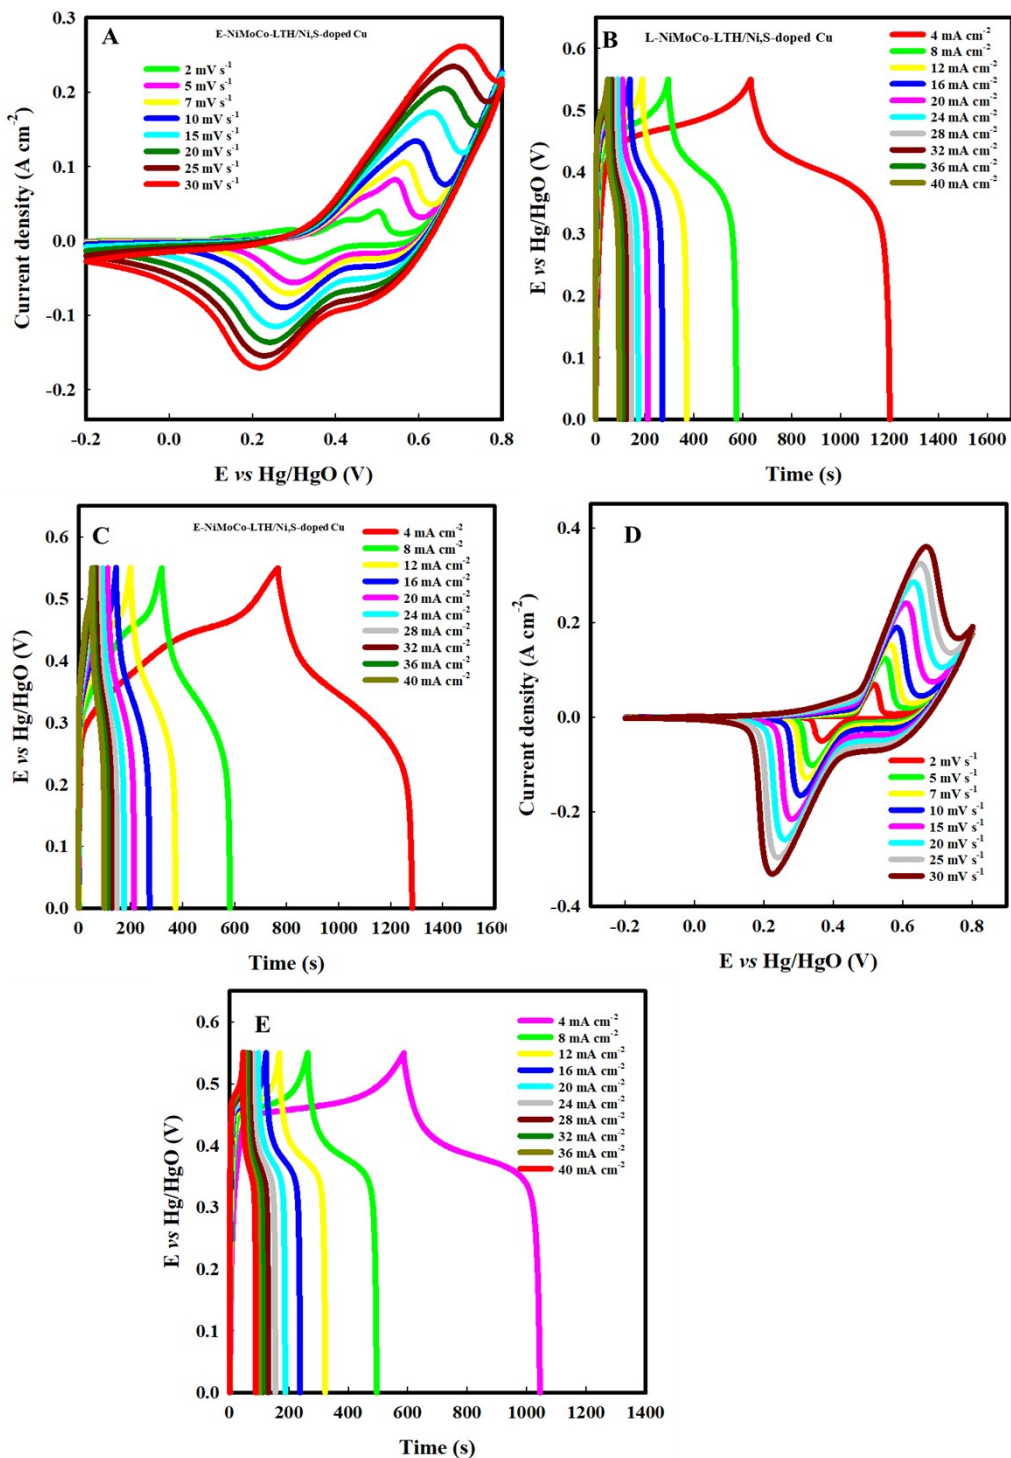

**Fig. S17.** (A) CV curves of the E-NiMoCo-LTH/Ni,S-doped Cu@CW at different scan rates, (B) GCD curves of the L-NiMoCo-LTH/Ni,S-doped Cu@CW at different current densities, (C) GCD curves of the E-NiMoCo-LTH/Ni,S-doped Cu@CW at different current densities, (D) CV curves of the NiMo-LDH/Ni,S-doped Cu@CW at different scan rates, (E) GCD curves of the NiMo-LDH/Ni,S-doped Cu@CW at different current densities

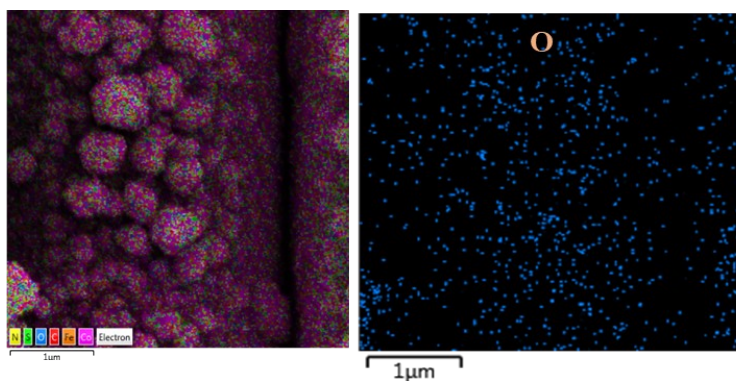

**Fig. S18.** Elemental mapping of the FeCoS/NCGH@CF

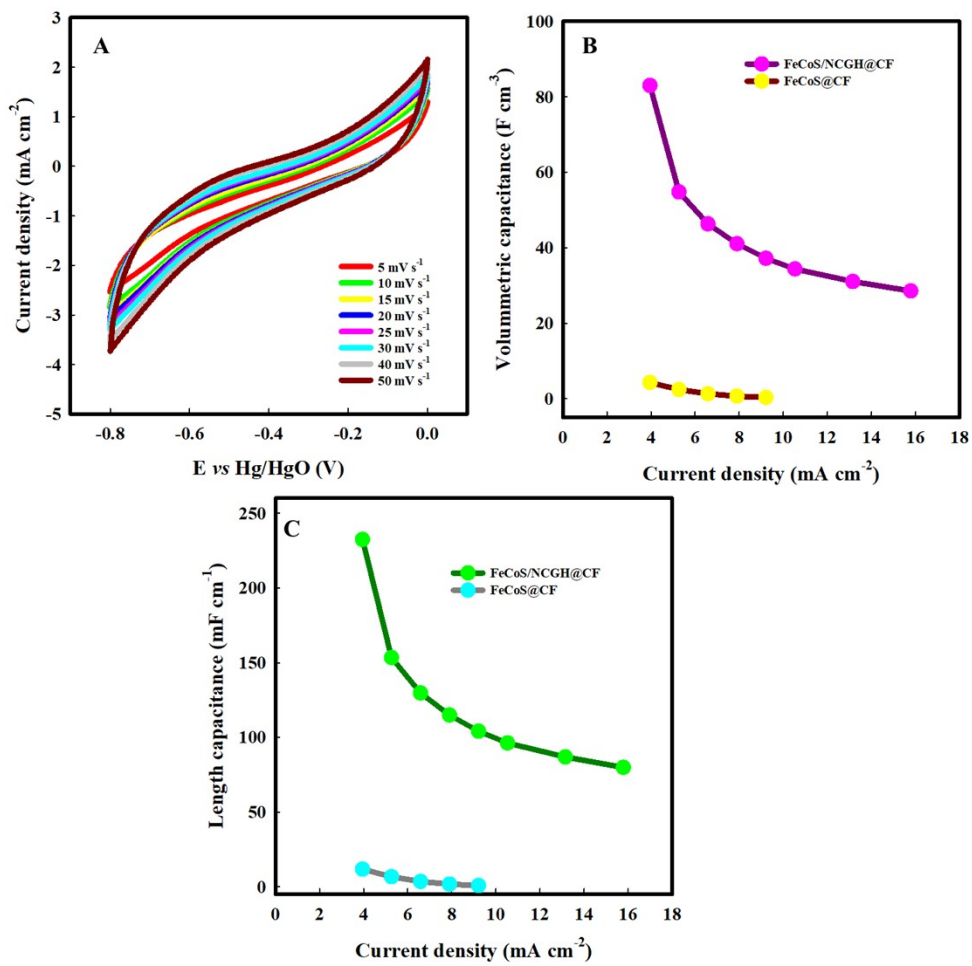

**Fig. S19.** (A) CV curves of the FeCoS@CF at different scan rates, (B) plot of the volumetric capacitance calculated from GCD curves for FeCoS@CF and FeCoS/GNCH at different current densities, (C) plot of the length capacitance calculated from GCD curves for FeCoS@CF and FeCoS/GNCH at different current densities.

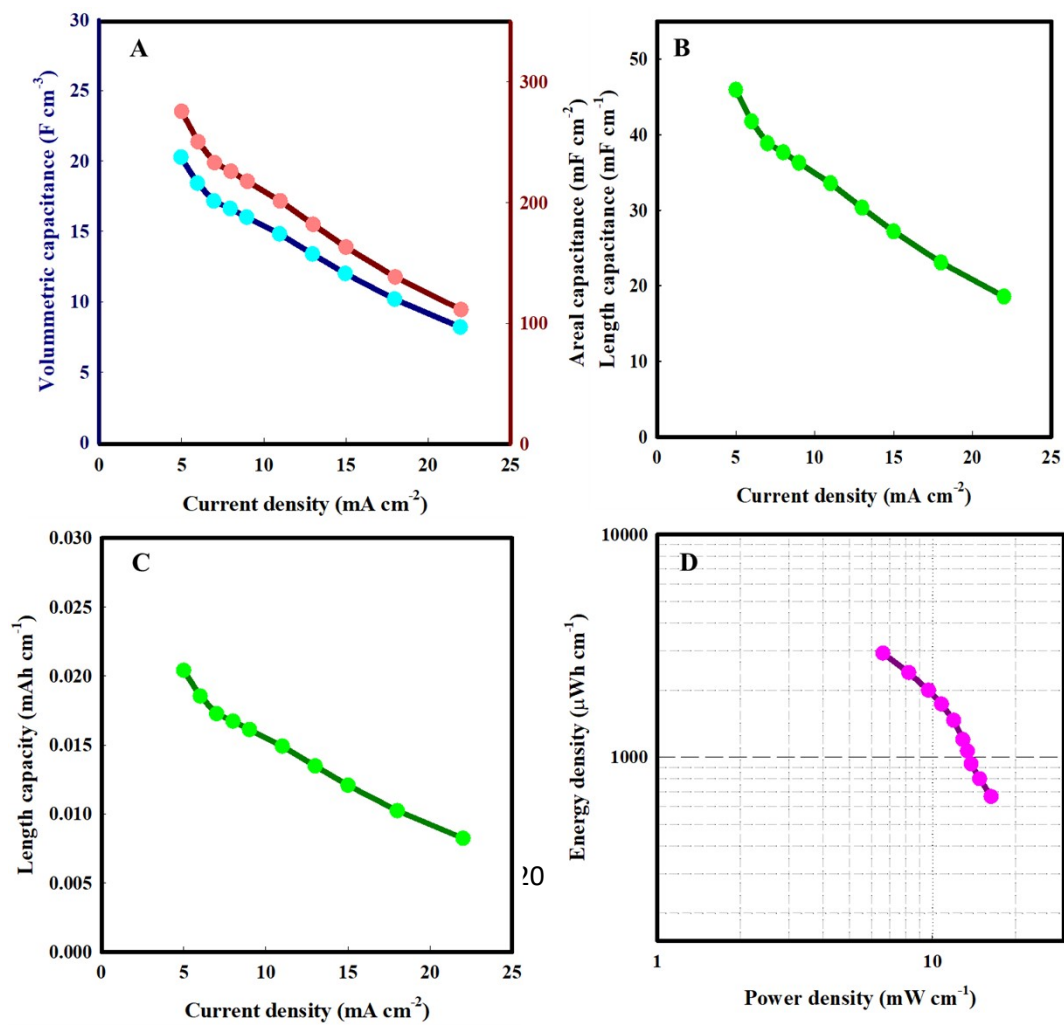



**Fig. S20.** Plot of the (A) Areal, volumetric capacities, and length (B) capacity and (C) capacitance calculated from GCD curves 1D microdevice at different current densities, (B) length Ragon plot for 1D microdevice

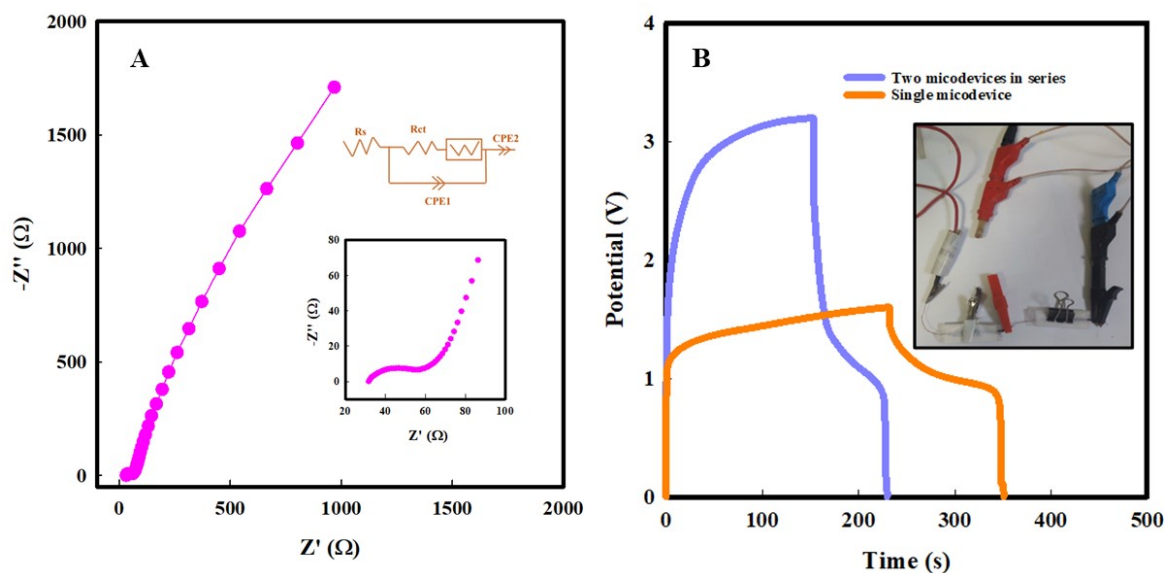

**Fig. S21.** (A) EIS spectra of the assembled microdevice, (B) GCD profiles of two micro-devices connected in series at 1.25 mA.

| Electrode material                                     | Areal capacity<br>(capacitance)                           | Volumetric<br>capacity<br>(capacitance)                    | Length capacity<br>(capacitance)                            |
|--------------------------------------------------------|-----------------------------------------------------------|------------------------------------------------------------|-------------------------------------------------------------|
| <b>Ni,S-doped Cu</b>                                   | 0.947 mAh cm <sup>-2</sup><br>(3.41 F cm <sup>-2</sup> )  | 94.74 mAh cm <sup>-3</sup><br>(341.06 F cm <sup>-3</sup> ) | 0.118 mAh cm <sup>-1</sup><br>(426.3 mF cm <sup>-1</sup> )  |
| <b>NiMo-LDH/Ni,S-doped Cu</b>                          | 1.34 mAh cm <sup>-2</sup><br>(4.84 F cm <sup>-2</sup> )   | 134.4 mAh cm <sup>-3</sup><br>(483.76 F cm <sup>-3</sup> ) | 0.168 mAh cm <sup>-1</sup><br>(604.7 mF cm <sup>-1</sup> )  |
| <b>NiMoCo-LTH/Ni,S-doped Cu</b>                        | 2.279 mAh cm <sup>-2</sup><br>(8.204 F cm <sup>-2</sup> ) | 227.9 mAh cm <sup>-3</sup><br>(820.4 F cm <sup>-3</sup> )  | 0.285 mAh cm <sup>-1</sup><br>(1025.5 mF cm <sup>-1</sup> ) |
| <b>L-NiMoCo-LTH/Ni,S-doped Cu</b>                      | 1.31 mAh cm <sup>-2</sup><br>(4.72 F cm <sup>-2</sup> )   | 131.1 mAh cm <sup>-3</sup><br>(472 F cm <sup>-3</sup> )    | 0.164 mAh cm <sup>-1</sup><br>(590 mF cm <sup>-1</sup> )    |
| <b>E-NiMoCo-LTH/Ni,S-doped Cu</b>                      | 1.92 mAh cm <sup>-2</sup><br>(6.916 F cm <sup>-2</sup> )  | 192.1 mAh cm <sup>-3</sup><br>(691.6 F cm <sup>-3</sup> )  | 0.240 mAh cm <sup>-1</sup><br>(864 mF cm <sup>-1</sup> )    |
| <b>Ni<sub>2</sub>Mo<sub>3</sub>N-CoN/Ni,S-doped Cu</b> | 2.755 mAh cm <sup>-2</sup><br>(9.92 F cm <sup>-2</sup> )  | 275.5 mAh cm <sup>-3</sup><br>(992 F cm <sup>-3</sup> )    | 0.344 mAh cm <sup>-1</sup><br>(1240 mF cm <sup>-1</sup> )   |

**Table S1.** Areal, volumetric and length capacity and capacitance values of the different microelectrodes at scan rate of 5 mV s<sup>-1</sup>

**Table S2.** Areal, volumetric and length capacity and capacitance values of the different microelectrodes at current density of  $4 \text{ mA cm}^{-2}$

| Electrode material                                     | Areal capacity (capacitance)                             | Volumetric capacity (capacitance)                          | Length capacity (capacitance)                               |
|--------------------------------------------------------|----------------------------------------------------------|------------------------------------------------------------|-------------------------------------------------------------|
| <b>Ni,S-doped Cu</b>                                   | 0.284 mAh cm <sup>-2</sup><br>(1.86 F cm <sup>-2</sup> ) | 28.4 mAh cm <sup>-3</sup><br>(185.89 F cm <sup>-3</sup> )  | 0.0355 mAh cm <sup>-1</sup><br>(232.4 mF cm <sup>-1</sup> ) |
| <b>NiMo-LDH/Ni,S-doped Cu</b>                          | 0.508 mAh cm <sup>-2</sup><br>(3.32 F cm <sup>-2</sup> ) | 50.8 mAh cm <sup>-3</sup><br>(332.5 F cm <sup>-3</sup> )   | 0.063 mAh cm <sup>-1</sup><br>(415.6 mF cm <sup>-1</sup> )  |
| <b>NiMoCo-LTH/Ni,S-doped Cu</b>                        | 0.966 mAh cm <sup>-2</sup><br>(6.32 F cm <sup>-2</sup> ) | 96.6 mAh cm <sup>-3</sup><br>(632.14 F cm <sup>-3</sup> )  | 0.121 mAh cm <sup>-1</sup><br>(790.2 mF cm <sup>-1</sup> )  |
| <b>L-NiMoCo-LTH/Ni,S-doped Cu</b>                      | 0.631 mAh cm <sup>-2</sup><br>(4.13 F cm <sup>-2</sup> ) | 63.1 mAh cm <sup>-3</sup><br>(413.23 F cm <sup>-3</sup> )  | 0.079 mAh cm <sup>-1</sup><br>(516.5 mF cm <sup>-1</sup> )  |
| <b>E-NiMoCo-LTH/Ni,S-doped Cu</b>                      | 0.573 mAh cm <sup>-2</sup><br>(3.75 F cm <sup>-2</sup> ) | 57.33 mAh cm <sup>-3</sup><br>(375.27 F cm <sup>-3</sup> ) | 0.0716 mAh cm <sup>-1</sup><br>(469 mF cm <sup>-1</sup> )   |
| <b>Ni<sub>2</sub>Mo<sub>3</sub>N-CoN/Ni,S-doped Cu</b> | 1.5 mAh cm <sup>-2</sup><br>(9.81 F cm <sup>-2</sup> )   | 149.92 mAh cm <sup>-3</sup><br>(981.3 F cm <sup>-3</sup> ) | 0.187 mAh cm <sup>-1</sup><br>(1230 mF cm <sup>-1</sup> )   |

**Table S3.** Performance comparison of the Ni<sub>2</sub>Mo<sub>3</sub>N-CoN/Ni,S-doped Cu@CW with other reports

| Electrode materials                                              | Current collectors     | Current density       | Specific capacitance                                                           | Ref       |
|------------------------------------------------------------------|------------------------|-----------------------|--------------------------------------------------------------------------------|-----------|
| <b>Ni<sub>2</sub>Mo<sub>3</sub>N-CoN/Ni,S-doped Cu</b>           | Cu wire                | 4 mA cm <sup>-2</sup> | 9.81 F cm <sup>-2</sup><br>981.3 F cm <sup>-3</sup><br>1.22 F cm <sup>-1</sup> | This work |
| <b>S-doped CoZnNi-OH/CuCoP</b>                                   | Cu wire                | 4 mA cm <sup>-2</sup> | 2.9 F cm <sup>-2</sup><br>290.1 F cm <sup>-3</sup><br>0.348 F cm <sup>-1</sup> | 1         |
| <b>MnCo<sub>2</sub>O<sub>4</sub>@Co<sub>3</sub>O<sub>4</sub></b> | Ni foam (using binder) | 1 mA cm <sup>-2</sup> | 3199.24 mF cm <sup>-2</sup>                                                    | 2         |

|                                                   |         |                                              |                                                                                 |    |
|---------------------------------------------------|---------|----------------------------------------------|---------------------------------------------------------------------------------|----|
| <b>CuO/CF@ NiCoMn-OH</b>                          | Cu foam | 8 mA cm <sup>-2</sup><br>1 A g <sup>-1</sup> | 26.8 F cm <sup>-2</sup><br>2866 F g <sup>-1</sup>                               | 3  |
| <b>Ni-P@NMC-LDH</b>                               | Ni foam | 1 A g <sup>-1</sup>                          | 2980 F g <sup>-1</sup>                                                          | 4  |
| <b>NiCoMo oxide</b>                               | Ni foam | 1 A g <sup>-1</sup>                          | 3.31 F cm <sup>-2</sup>                                                         | 5  |
| <b>NiMo-LDH</b>                                   | Ni foam | 4 mA cm <sup>-2</sup>                        | 4.4 F cm <sup>-2</sup>                                                          | 6  |
| <b>CuO@NiMoO<sub>4</sub></b>                      | Cu foam | 3 mA cm <sup>-2</sup>                        | 3.9 F cm <sup>-2</sup>                                                          | 7  |
| <b>Cu<sub>3</sub>N@NiCo-N/Cu</b>                  | Cu foam | 1 mA cm <sup>-2</sup>                        | 8.49 F cm <sup>-2</sup>                                                         | 8  |
| <b>Co<sub>9</sub>S<sub>8</sub></b>                | Ni foam | 1 A g <sup>-1</sup>                          | 369.1 mAh g <sup>-1</sup>                                                       | 9  |
| <b>Cu<sub>x</sub>O NW@CoS<sub>2</sub></b>         | Cu foam | 1 mA cm <sup>-2</sup>                        | 2.46 mAh cm <sup>-3</sup>                                                       | 10 |
| <b>MnCo<sub>2</sub>O<sub>4</sub>/porous Ni/Ni</b> | Cu wire | 2 mA cm <sup>-2</sup>                        | 1.798 F cm <sup>-2</sup>                                                        | 11 |
| <b>3D-NiCo<sub>2</sub>S<sub>4</sub></b>           | Ni wire | 0.2 mA cm <sup>-1</sup>                      | 199.74 F cm <sup>-3</sup><br>98 mF cm <sup>-1</sup><br>1.248 F cm <sup>-2</sup> | 12 |
| <b>3D-NiCoO<sub>4</sub></b>                       | Ni wire | 2.5 mA                                       | 38.84 F cm <sup>-3</sup>                                                        | 13 |

**Table S4.** the comparative of the electrochemical properties of electrodes based on fiber substrates and similar electroactive material for supercapacitor

| Supercapacitor                                                                     | Specific capacitance                                  | Current density          | Voltage | Maximum energy density                                                           | Maximum power density                                                            | Stability                                             | Ref              |
|------------------------------------------------------------------------------------|-------------------------------------------------------|--------------------------|---------|----------------------------------------------------------------------------------|----------------------------------------------------------------------------------|-------------------------------------------------------|------------------|
| <b>Ni<sub>2</sub>Mo<sub>3</sub>N-CoN/Ni,S-doped Cu@CW//FeCoS/GNCH@CF</b>           | 275.6 mF cm <sup>-2</sup><br>20.3 F cm <sup>-3</sup>  | 5 mA cm <sup>-2</sup>    | 1.6 V   | 98 μWh cm <sup>-2</sup><br>7.2 mWh cm <sup>-3</sup><br>16.3 μWh cm <sup>-1</sup> | 17.6 mW cm <sup>-2</sup><br>1294 mW cm <sup>-3</sup><br>2933 μW cm <sup>-1</sup> | 94% after 5000 cycles<br>At 10 mA cm <sup>-2</sup>    | <b>This work</b> |
| <b>CuO/CF@NiCoMn-OH//AC</b>                                                        | 19.3 F g <sup>-1</sup>                                | 2 A g <sup>-1</sup>      | 1.5 V   | 37.28 Wh kg <sup>-1</sup>                                                        | At 170 W kg <sup>-1</sup>                                                        | 62.5% even at 3000 cycles at 8 A g <sup>-1</sup>      | 3                |
| <b>Ni-Co-N/GP GOP Substrate: graphene paper</b>                                    | 4.24 F/cm <sup>3</sup><br>42.3 mF/cm <sup>2</sup>     | 0.5 mA/cm <sup>2</sup>   | 1.6 V   | 4.78 mWh cm <sup>-3</sup>                                                        | 1.26 W/cm <sup>3</sup>                                                           | 89% after 8000 cycles at 5 mA cm <sup>-2</sup>        | 14               |
| <b>0.075 Mo-NiCo-LDH@C//RGO Substrate: CC</b>                                      | 235.1 C g <sup>-1</sup>                               | 1 A g <sup>-1</sup>      | 1.6 V   | 52.2 Wh kg <sup>-1</sup>                                                         | 32.2 Wh kg <sup>-1</sup>                                                         | 84.2 % after 10000 cycles at 10 A g <sup>-1</sup>     | 15               |
| <b>Cu<sub>3</sub>N@NiCo-N/Cu//rGO Substrate: Cu foam</b>                           | 351.3 mF cm <sup>-2</sup>                             | 2 mA cm <sup>-2</sup>    | 1.6 V   | 124.9 μWh cm <sup>-2</sup><br>12.49 mWh cm <sup>-3</sup>                         | 8 mW cm <sup>-2</sup><br>0.8 W cm <sup>-3</sup>                                  | After 8000 cycles at 20 mA cm <sup>-2</sup><br>86.68% | 8                |
| <b>NF/Ni-P@NMC-LDH//AC Substrate: NF</b>                                           | 202.67 F g <sup>-1</sup>                              | 0.8 A g <sup>-1</sup>    | 1.8 V   | 91.2 Wh kg <sup>-1</sup>                                                         | 1812.3 W·kg <sup>-1</sup>                                                        | 86.97 % after 5000 cycles at 3 A g <sup>-1</sup>      | 4                |
| <b>MnCo<sub>2</sub>O<sub>4</sub>@Co<sub>3</sub>O<sub>4</sub>/AC Substrate: NF</b>  | 1338 C cm <sup>-2</sup><br>148.7 C g <sup>-1</sup>    | 2.5 mA cm <sup>-2</sup>  | 1.5 V   | 31 Wh kg <sup>-1</sup>                                                           | 3326.6 Wkg <sup>-1</sup>                                                         | 101.23% after 8000 cycles at 130 mA cm <sup>-2</sup>  | 2                |
| <b>Co<sub>3</sub>S<sub>4</sub>@NiO//AC Substrate: powder pasted on NF</b>          | 164.80 F g <sup>-1</sup>                              | 1 A g <sup>-1</sup>      | 1.55 V  | 54.99 Wh kg <sup>-1</sup>                                                        | 19.10 kW kg <sup>-1</sup>                                                        | 86.1% after 10,000 cycles at 5 A g <sup>-1</sup>      | 16               |
| <b>NiCoMoO-P//N-rGO Substrate: NF</b>                                              | 109.1F g <sup>-1</sup>                                | 0.5 A g <sup>-1</sup>    | 1.6 V   | 45.3 Wh Kg <sup>-1</sup>                                                         | 4000 W Kg <sup>-1</sup>                                                          | 60% after 2000 Cycles at 1 A g <sup>-1</sup>          | 17               |
| <b>CoNi<sub>2</sub>S<sub>4</sub>/E-NZP//rGO (solid state) Substrate: CW and CF</b> | 241 mF cm <sup>-2</sup><br>18.54 F cm <sup>-3</sup>   | 4 mA cm <sup>-2</sup>    | 1.8 V   | 108.4 μWh cm <sup>-2</sup><br>8.34 mWh cm <sup>-3</sup>                          | 9280 μW cm <sup>-2</sup><br>716.9 mW cm <sup>-3</sup>                            | 88.89% after 5000 cycles at 5.6 mA cm <sup>-2</sup>   | 18               |
| <b>CoZnNiS@CNTs/rGO //carbon spheres integrated graphene</b>                       | 185.1 F cm <sup>3</sup>                               | 1.5 A g <sup>-1</sup>    | 1.6 V   | 65.2 Wh h L <sup>-1</sup>                                                        | at 1308 W L <sup>-1</sup>                                                        | 90.6% after 10000 cycles                              | 19               |
| <b>CoVSe/NiCuSe@CW//PPy/RGO@CF</b>                                                 | 351.7 mF cm <sup>-2</sup><br>56.73 F cm <sup>-3</sup> | 4.8 mA cm <sup>-2</sup>  | 1.6 V   | 111.4 μWh cm <sup>-2</sup><br>20.17 mWh cm <sup>-3</sup>                         | 12900 μW cm <sup>-2</sup><br>2081.14 mW cm <sup>-3</sup>                         | 96.7% after 5000 cycles at 6.4 mA cm <sup>-2</sup>    | 20               |
| <b>Symmetric Cu@Ni/porous Ni/MnCo<sub>2</sub>O<sub>4</sub></b>                     | 54.8 mF cm <sup>-2</sup><br>-                         | 0.18 mA cm <sup>-2</sup> | 1.3 V   | 4.8 μWh cm <sup>-2</sup>                                                         | 1040 μW cm <sup>-2</sup>                                                         | -                                                     | 11               |
| <b>NiCo<sub>2</sub>S<sub>4</sub>//N-rGO</b>                                        | 120 mF cm <sup>-2</sup><br>19.57 F cm <sup>-3</sup>   | 0.2 mA                   | 1.4 V   | 32.67 μWh cm <sup>-2</sup><br>5.33 mWh cm <sup>-3</sup>                          | 5352.92 μW cm <sup>-2</sup><br>855.69 mW cm <sup>-3</sup>                        | 92% after 1000 cycles at 3 mA                         | 12               |

## References



- [1] L. Naderi, S. Shahrokhian. Wire-type flexible micro-supercapacitor based on MOF-assisted sulfide nano-arrays on dendritic CuCoP and V<sub>2</sub>O<sub>5</sub>-polypyrrole/nanocellulose hydrogel. *Chem. Eng. J.* 476 (2023) 146764.
- [2] J-J. Zhou, X. Han, K. Tao, Q. Li, Y-L. Li, Ch. Chen, L. Han, Shish-kebab type MnCo<sub>2</sub>O<sub>4</sub>@Co<sub>3</sub>O<sub>4</sub> nanoneedle arrays derived from MnCo-LDH@ZIF-67 for high-performance supercapacitors and efficient oxygen evolution reaction, *Chem. Eng. J.* 354 (2018) 875–884.
- [3] L. Lei, X. Zhang, Y. Su, Sh. Wu, J. Shen, Metal–Organic Framework (MOF)-Assisted Construction of Core–Shell Nanoflower-like CuO/CF@NiCoMn–OH for High-Performance Supercapacitor, *Energy Fuels* 2021, 35, 8387–8395
- [4] J. Wang, Y. Zou, C. Xiang, F. Xu, L. Sun, Ternary NiMoCo-layered double hydroxides grown on chemically plated Ni–P alloyed nickel foam for high-performance supercapacitors, *Journal of Energy Storage* 58 (2023) 106388.
- [5] H. Huang, X. Wei, G. Wei, F. Yan, L. Yan, Y. Han, Sh. Xu, X. Liang, W. Zhou, J. Guo, Construction of vertically aligned Ni-Co-Mo hybrid oxides nanosheet array for high-performance hybrid supercapacitors, *J. Alloys Compd.* 899 (2022) 163267.
- [6] Y. B. Chen, J. J. You, Y. H. Chen, L. A. Ma, H. X. Chen, Z. H. Wei, X. Y. Ye, L. Zhang, Low-crystalline nickel hydroxide nanosheets embedded with NiMoO<sub>4</sub> nanoparticles on nickel foam for high-performance supercapacitor applications. *CrystEngComm* 24 (2022) 5238-5250.
- [7] D. Yu, Z. Zhang, Y. Teng, Y. Meng, Y. Wu, X. Liu, Y. Hua, X. Zhao, X. Liu, Fabrication of CuO@NiMoO<sub>4</sub> core-shell nanowire arrays on copper foam and their application in high-performance all-solid-state asymmetric supercapacitors. *J. Power Sources* 440 (2019) 227164.
- [8] Z. Hu, Y. Miao, H. Chen, L. Ding, J. Qi, F. Wei, Q. Meng, B. Xiao, X. Xue, Q. Yin, Y. Li, Y. Sui, X. Feng, W. Zhang, P. Cao, J. Liu, Ultrathin nickel cobalt nitride nanoflowers embedded in Cu<sub>3</sub>N porous nanorod arrays for ultrahigh capacitance energy storage, *J. Power Sources* 536 (2022) 231485.
- [9] Zh. Peng, H. Zou, W. Yang, Zh. Feng, Sh. Chen. Hierarchical porous Co<sub>9</sub>S<sub>8</sub> nanowire arrays derived from zeolitic imidazolate framework on Ni foam for button-type asymmetric supercapacitor. *J. Energy Storage* 40 (2021) 102697.
- [10] G.P. Ojha, A. Muthurasu, A. P. Tiwari, B. Pant, K. Chhetri, T. Mukhiya, B. Dahal, M. Lee, M. Park, H-Y. Kim, Vapor solid phase grown hierarchical Cu<sub>x</sub>O NWs integrated MOFs-derived CoS<sub>2</sub> electrode for high-performance asymmetric supercapacitors and the oxygen evolution reaction. *Chem. Eng. J.* 399 (2020) 125532
- [11] Y. Ji, J. Xie, J. Wu, Y. Yang, X.Z. Fua, R. Sun, C.P. Wong, Hierarchical nanothorns MnCo<sub>2</sub>O<sub>4</sub> grown on porous/dense Ni bi-layers coated Cu wire current collectors for high performance flexible solid-state fiber supercapacitors, *J. Power Sources*, 2018, 393 54–61.
- [12] B. Saravanakumar, S.S. Jayaseelan, M.K. Seo, H.Y. Kim, B.S. Kim, NiCo<sub>2</sub>S<sub>4</sub> nanosheet-decorated 3D, porous Ni film@Ni wire electrode materials for all solid-state asymmetric supercapacitor applications, *Nanoscale*, 2017, 9, 18819-18834.

- [13] A. Ramadoss, K.-N. Kang, H.-J. Ahn, S.-I. Kim, S.-T. Ryu, J.-H. Jang, Realization of high-performance flexible wire supercapacitors based on 3-dimensional NiCo<sub>2</sub>O<sub>4</sub>/Ni fibers, *J. Mater. Chem. A* 4 (2016) 4718–4727.
- [14] F. Liu, L. Zeng, Y. Chen, R. Zhang, R. Yang, J. Pang, L. Ding, H. Liua, W. Zhou, Ni-Co-N hybrid porous nanosheets on graphene paper for flexible and editable asymmetric all-solid-state supercapacitors, *Nano Energy* 61 (2019) 18–26
- [15] L. Xu, Y. Li, M. Li, N. Yu, W. Wang, F. Wei, J. Qi, Y. Sui, L. Li, L. Zhang, Mo-doped NiCo-LDH nanoflower derived from ZIF-67 nanosheet arrays for high-performance supercapacitors, *Journal of Energy Storage* 77 (2024) 109781.
- [16] Sh. Hou, Y. Lian, Y. Bai, Q. Zhou, Ch. Ban, Zh. Wang, J. Zhao, H. Zhang, Hollow dodecahedral Co<sub>3</sub>S<sub>4</sub>@NiO derived from ZIF-67 for supercapacitor, *Electrochimica Acta* 341 (2020) 136053.
- [17] H. Huang, C. Li, F. Yan, F. Yuan, X. Liang, W. Zhou, J. Guo, Bi-functional Ni-Co-Mo hybrid oxide/phosphide nanoarrays grown on Ni foam with enhanced charge storage and oxygen evolution reaction performance, *Applied Surface Science* 623 (2023) 157079.
- [18] S. Shahrokhian, L. Naderi, High-Performance, Flexible, All-Solid-State Wire-Shaped Asymmetric Micro-Supercapacitors Based on Three Dimensional CoNi<sub>2</sub>S<sub>4</sub> Nanosheets Decorated–Nanoporous Ni–Zn–P Film/Cu Wire, *J. Phys. Chem. C* 2019, 123, 21353–21366.
- [19] Y. Liu, Na Xin, Q. Yang, W. Shi, 3D CNTs/graphene network conductive substrate supported MOFs derived CoZnNiS nanosheet arrays for ultra-high volumetric/gravimetric energy density hybrid supercapacitor, *Journal of Colloid and Interface Science* 583 (2021) 288–298.
- [20] L. Naderi, Saeed Shahrokhian, Cobalt vanadium chalcogenide microspheres decorated with dendrite-like fiber nanostructures for flexible wire-typed energy conversion and storage microdevices, *Nanoscale*, 2022, 14, 9150.
